# Supplementary material
Source: MDPI journal article supplement (https://www.mdpi.com/2673-9585/1/1/8)
Supplement: s1 [file s1]

## SUPPLEMENTARY MATERIAL

### Analysis of different digital alternatives as teaching tools to improve the teaching-learning process

Victor Perez-Puyana <sup>1,\*</sup>, Mercedes Jiménez-Rosado <sup>1</sup> and Alberto Romero <sup>1</sup>

<sup>1</sup> Affiliation 1; Department of Chemical Engineering, Faculty of Chemistry, 41012 Seville (Spain). [vperez11@us.es](mailto:vperez11@us.es), [mjimenez42@us.es](mailto:mjimenez42@us.es), [alromero@us.es](mailto:alromero@us.es)

\* Correspondence: [vperez11@us.es](mailto:vperez11@us.es)

**Table S1.** Marks obtained for face-to-face lectures by each student. M: male; F: female; ME: Materials Engineering degree; PME: Physics and Materials Engineering degree; CME: Chemistry and Materials Engineering degree.

| Student | Gender | Degree | Mark |
|---------|--------|--------|------|
| 1       | M      | ME     | 6.0  |
| 2       | M      | ME     | 6.0  |
| 3       | M      | ME     | 7.0  |
| 4       | F      | ME     | 8.5  |
| 5       | M      | ME     | 5.0  |
| 6       | M      | ME     | 7.5  |
| 7       | M      | ME     | 8.0  |
| 8       | M      | ME     | 6.0  |
| 9       | M      | ME     | 7.0  |
| 10      | M      | ME     | 8.0  |
| 11      | M      | ME     | 8.0  |
| 12      | M      | ME     | 6.0  |
| 13      | M      | ME     | 8.0  |
| 14      | F      | ME     | 7.5  |
| 15      | M      | ME     | 5.0  |
| 16      | M      | ME     | 8.0  |
| 17      | M      | ME     | 6.0  |
| 18      | M      | ME     | 6.0  |
| 19      | M      | ME     | 7.0  |
| 20      | M      | ME     | 5.0  |
| 21      | M      | ME     | 8.0  |
| 22      | M      | ME     | 6.0  |
| 23      | F      | ME     | 7.5  |
| 24      | F      | ME     | 8.0  |
| 25      | F      | CME    | 8.5  |
| 26      | M      | CME    | 8.0  |
| 27      | M      | CME    | 9.0  |
| 28      | M      | CME    | 8.5  |
| 29      | M      | CME    | 8.0  |

---

|    |   |     |     |
|----|---|-----|-----|
| 30 | F | CME | 9.0 |
| 31 | M | CME | 9.0 |
| 32 | F | CME | 8.0 |
| 33 | M | CME | 7.0 |
| 34 | M | CME | 7.0 |
| 35 | M | CME | 8.0 |
| 36 | F | CME | 8.5 |
| 37 | M | CME | 8.5 |
| 38 | M | CME | 8.0 |
| 39 | M | CME | 7.0 |
| 40 | M | CME | 8.5 |
| 41 | M | PME | 8.5 |
| 42 | F | PME | 9.5 |
| 43 | F | PME | 8.0 |
| 44 | M | PME | 8.5 |
| 45 | M | PME | 9.5 |
| 46 | M | PME | 9.5 |
| 47 | F | PME | 8.5 |
| 48 | F | PME | 8.0 |
| 49 | M | PME | 8.5 |
| 50 | M | PME | 8.5 |
| 51 | M | PME | 8.0 |
| 52 | M | PME | 8.0 |
| 53 | M | PME | 8.0 |
| 54 | M | PME | 8.0 |
| 55 | M | PME | 8.0 |
| 56 | M | PME | 8.5 |

---

**Table S2:** Marks obtained for educational videos by each student. M: male; F: female; ME: Materials Engineering degree; PME: Physics and Materials Engineering degree; CME: Chemistry and Materials Engineering degree.

| Student | Gender | Degree | Mark |
|---------|--------|--------|------|
| 1       | F      | ME     | 4.0  |
| 2       | M      | ME     | 9.0  |
| 3       | F      | ME     | 9.5  |
| 4       | M      | ME     | 8.0  |
| 5       | M      | ME     | 9.5  |
| 6       | M      | ME     | 6.5  |
| 7       | M      | ME     | 8.0  |
| 8       | M      | ME     | 9.5  |
| 9       | M      | ME     | 9.0  |
| 10      | M      | ME     | 6.0  |
| 11      | M      | ME     | 9.0  |
| 12      | F      | ME     | 8.0  |
| 13      | M      | ME     | 5.0  |
| 14      | F      | ME     | 8.0  |
| 15      | M      | ME     | 6.5  |
| 16      | M      | ME     | 4.0  |
| 17      | M      | ME     | 8.0  |
| 18      | M      | ME     | 6.0  |
| 19      | M      | ME     | 6.5  |
| 20      | M      | ME     | 4.0  |
| 21      | M      | ME     | 8.0  |
| 22      | M      | ME     | 9.5  |
| 23      | M      | ME     | 5.0  |
| 24      | M      | ME     | 5.0  |
| 25      | M      | CME    | 7.5  |
| 26      | M      | CME    | 7.5  |
| 27      | F      | CME    | 9.0  |
| 28      | M      | CME    | 7.5  |
| 29      | M      | CME    | 7.5  |
| 30      | M      | CME    | 9.0  |
| 31      | M      | CME    | 8.5  |
| 32      | M      | CME    | 9.0  |
| 33      | F      | CME    | 8.5  |
| 34      | M      | CME    | 9.0  |
| 35      | F      | CME    | 9.0  |
| 36      | F      | CME    | 7.5  |
| 37      | F      | CME    | 7.5  |
| 38      | M      | CME    | 7.5  |
| 39      | M      | CME    | 9.0  |
| 40      | M      | CME    | 7.5  |
| 41      | M      | CME    | 8.5  |
| 42      | M      | PME    | 8.0  |
| 43      | M      | PME    | 8.0  |

|    |   |     |     |
|----|---|-----|-----|
| 44 | M | PME | 8.0 |
| 45 | F | PME | 9.5 |
| 46 | M | PME | 7.5 |
| 47 | F | PME | 7.5 |
| 48 | M | PME | 9.5 |
| 49 | F | PME | 9.5 |
| 50 | F | PME | 7.5 |

**Table S3:** Marks obtained for virtual lab by each student. M: male; F: female; ME: Materials Engineering degree; PME: Physics and Materials Engineering degree; CME: Chemistry and Materials Engineering degree.

| Student | Gender | Degree | Mark |
|---------|--------|--------|------|
| 1       | M      | ME     | 6.2  |
| 2       | M      | ME     | 6.7  |
| 3       | M      | ME     | 5.3  |
| 4       | F      | ME     | 8.9  |
| 5       | M      | ME     | 5.3  |
| 6       | M      | ME     | 6.2  |
| 7       | F      | ME     | 7.3  |
| 8       | F      | ME     | 7.8  |
| 9       | M      | ME     | 6.1  |
| 10      | M      | ME     | 10.0 |
| 11      | M      | ME     | 7.3  |
| 12      | F      | ME     | 7.5  |
| 13      | M      | ME     | 6.2  |
| 14      | F      | ME     | 8.9  |
| 15      | F      | ME     | 6.6  |
| 16      | M      | ME     | 7.5  |
| 17      | F      | ME     | 9.4  |
| 18      | M      | ME     | 6.8  |
| 19      | M      | ME     | 8.9  |
| 20      | F      | ME     | 6.5  |
| 21      | F      | CME    | 9.5  |
| 22      | M      | CME    | 9.2  |
| 23      | M      | CME    | 9.2  |
| 24      | M      | CME    | 9.2  |
| 25      | M      | CME    | 7.7  |
| 26      | M      | CME    | 10.0 |
| 27      | M      | CME    | 9.2  |
| 28      | M      | CME    | 8.7  |
| 29      | M      | CME    | 8.7  |
| 30      | F      | CME    | 9.7  |
| 31      | F      | CME    | 10.0 |
| 32      | F      | CME    | 9.7  |
| 33      | M      | PME    | 8.6  |
| 34      | F      | PME    | 10.0 |
| 35      | F      | PME    | 9.0  |
| 36      | F      | PME    | 8.9  |
| 37      | M      | PME    | 10.0 |
| 38      | M      | PME    | 9.0  |
| 39      | M      | PME    | 10.0 |
| 40      | M      | PME    | 9.3  |
| 41      | M      | PME    | 8.9  |
